# Supplementary material for: Rapid Isothermal Amplification and Portable Detection System for SARS-CoV-2
Source: PubMed Central journal article supplement — bioRxiv. 2020 May 21:2020.05.21.108381. Preprint. [Version 1] doi: 10.1101/2020.05.21.108381 (PMC7263486; doi:10.1101/2020.05.21.108381), 2020-05-21
Supplement: NIHPP2020.05.21.108381-supplement-1.pdf [file NIHPP2020.05.21.108381-supplement-1.pdf]

## Supplementary information

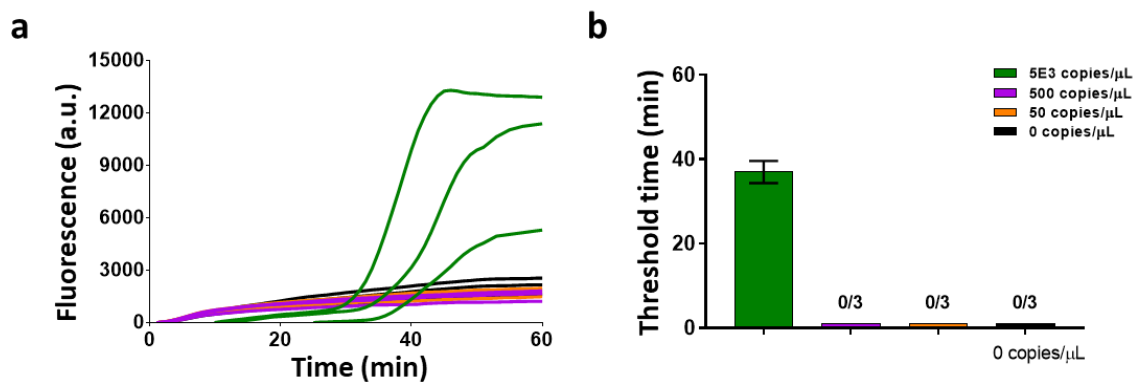

**Fig. S1. Characterization of SARS-CoV-2 virus in nasal fluid in a 96 μL reaction. (a-b)** Raw fluorescence data and amplification threshold times (for 3 replicates of data) for viral detection in a 96 μL reaction with 50% nasal fluid per reaction. Thermal lysis at 95°C was conducted for 1 min. of the virus in nasal fluid sample before addition of RT-LAMP reagents for the final reaction. The bar graphs show mean and standard deviation. Fraction indicates number of replicates amplified.

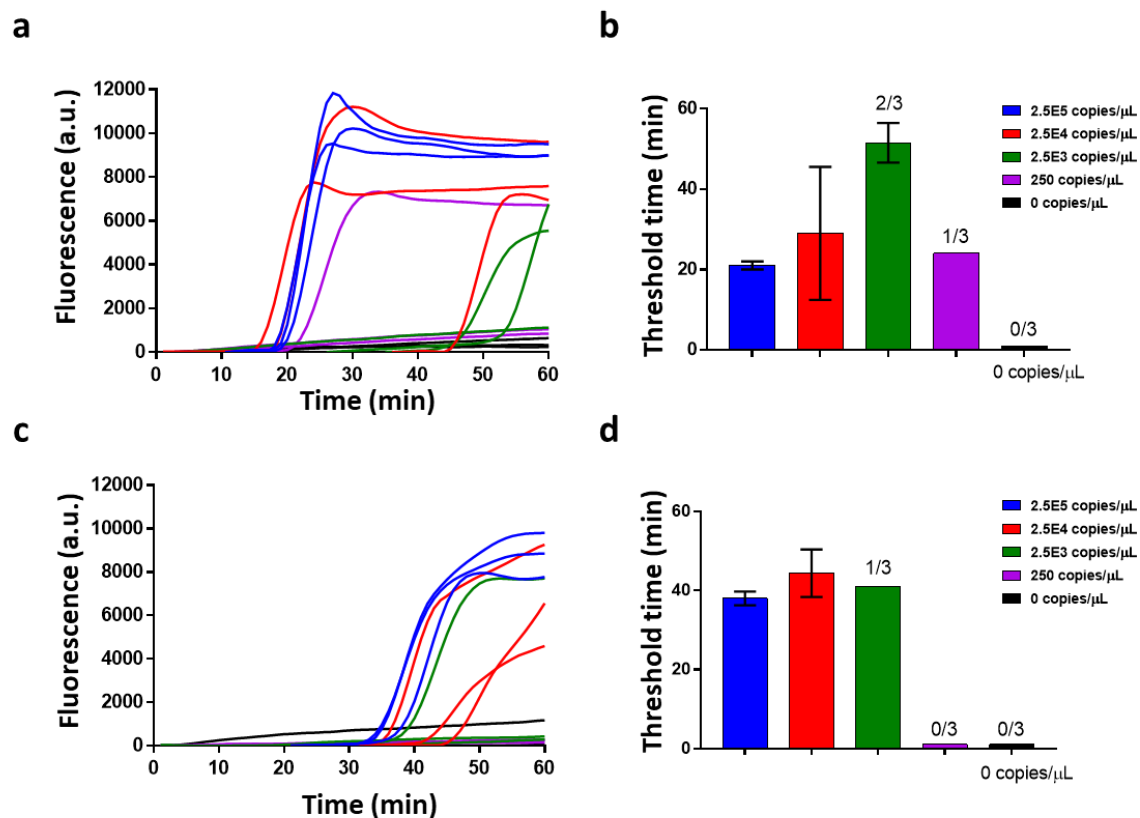

**Fig. S2. Characterization of SARS-CoV-2 virus in mock swab samples transported in 100  $\mu$ L Viral Transport Media. (a-b)** Raw fluorescence data and amplification threshold times (for 3 replicates of data) for viral detection in a 16  $\mu$ L reaction with 12.5% VTM per reaction from a 100  $\mu$ L VTM sample. **(c-d)** Raw fluorescence data and amplification threshold times (for 3 replicates of data) for viral detection in a 16  $\mu$ L reaction with 12.5% VTM per reaction from a 100  $\mu$ L VTM sample. The bar graphs show mean and standard deviation.

**RT-LAMP protocol (estimated total time: 30 - 60 min.)**

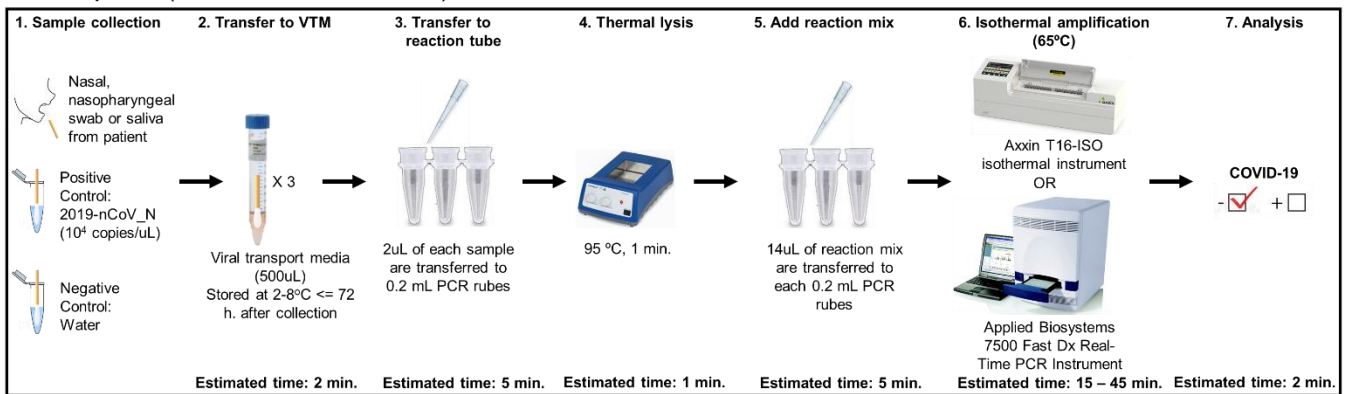

**RT-PCR protocol (estimated total time: 119 min.)**

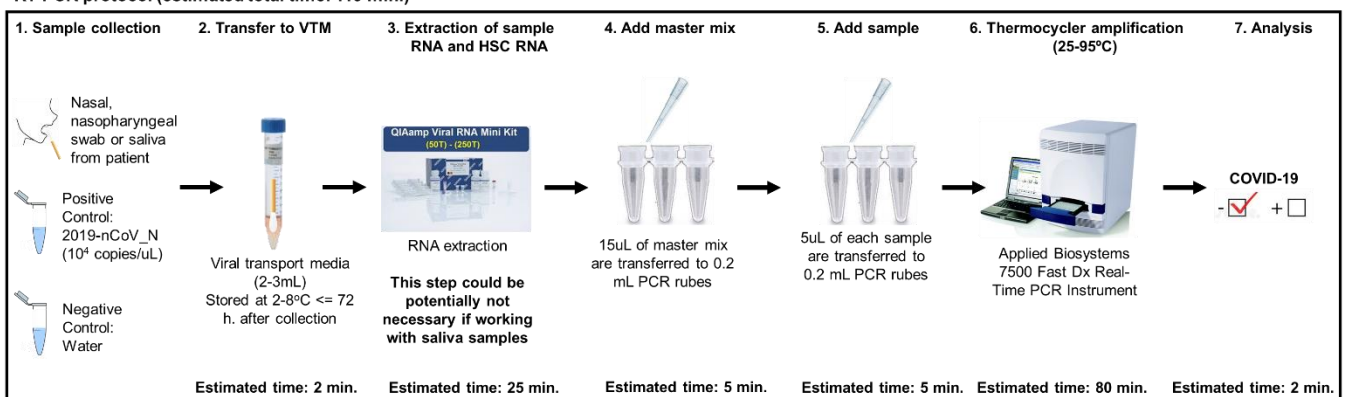

**Fig. S3. RT-LAMP assay process flow and comparison side by side with the RT-PCR assay process flow.**

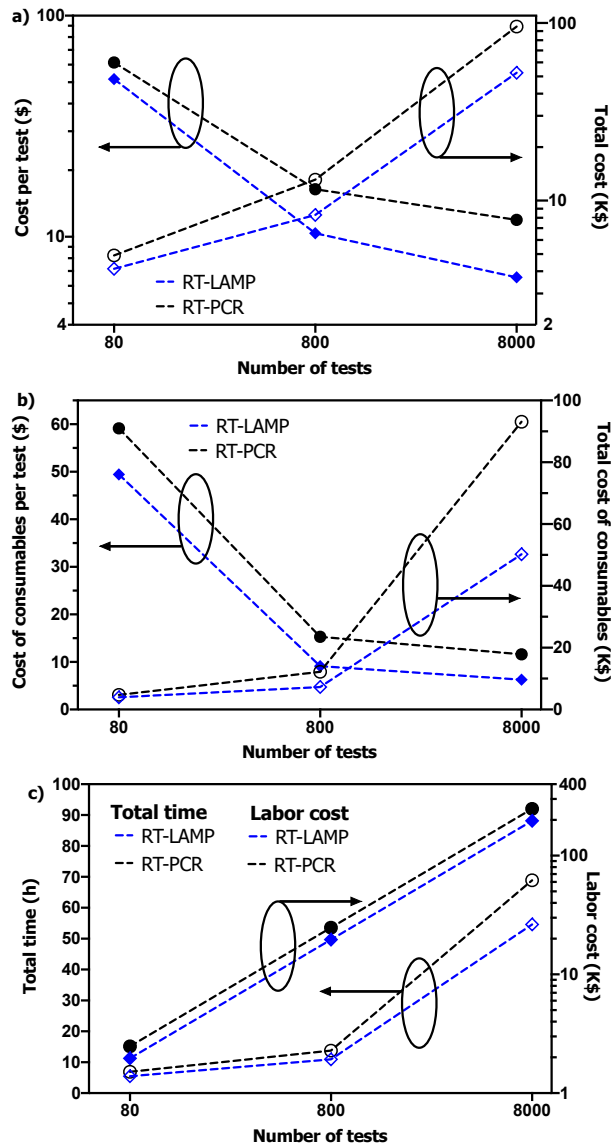

**Fig. S4: Resources modeling results.** a) Cost per test and total cost (excluding labor) for the three scenarios considered; b) Total cost of consumables and Cost of consumables per test for the 3 models designed; c) Labor cost and Total time for the 3 models designed. The labor cost assumes a gross salary rate = \$1/min.

**Table S1. RT-LAMP primer sequences for 12 primer sets (3 primer sets each for 4 target genes)**

|                   |               |           |                                                     |                      |
|-------------------|---------------|-----------|-----------------------------------------------------|----------------------|
| <b>Gene Orf1a</b> | <b>P1</b>     | F3        | ATCTAGTTGTAATGGCCTACA                               |                      |
|                   |               | B3        | ACAAGCACAGGTTGAGAT                                  |                      |
|                   |               | FIP       | TGAGTTTTTCATAAACAGTGCCAAA-CAGGTGGTGTGTTTCAGT        |                      |
|                   |               | BIP       | AACCCGTCCTTGATTGGCTT-AATTTAACAATTTCCCAACCGTC        |                      |
|                   |               | Loop F    | TGTTAGTTAGCCACTGCGAAGT                              |                      |
|                   | <b>P2</b>     | F3        | AAACCCGTCCTTGATTGG                                  |                      |
|                   |               | B3        | CTTTAAGTTTAGCTCCACCAAT                              |                      |
|                   |               | FIP       | TCACAAGCACAGGTTGAGATAAATT-GAAGGTGTAGAGTTTCTTAGAGAC  |                      |
|                   |               | BIP       | GTCACCTGTGCAAAGGAAATTAAG-AGAGTCAGCACACAAAGC         |                      |
|                   | <b>P3</b>     | F3        | CGGTGGACAAATTGTCAC                                  |                      |
|                   |               | B3        | CTTCTCTGGATTTAACACACTT                              |                      |
|                   |               | FIP       | TCAGCACACAAAGCCAAAAATTTAT-CTGTGCAAAGGAAATTAAGGAG    |                      |
|                   |               | BIP       | TATTGGTGGAGCTAAACTTAAAGCC-CTGTACAATCCCTTTGAGTG      |                      |
|                   | <b>Gene S</b> | <b>P1</b> | F3                                                  | TCTTTCACACGTGGTGTT   |
|                   |               |           | B3                                                  | CAGTGGAAGCAAATAAACAC |
| FIP               |               |           | GAAAGGTAAGAACAAGTCCTGAGT-TTACCCTGACAAAGTTTTTCAG     |                      |
| BIP               |               |           | TTCCAATGTTACTTGGTTCCATGC-GACAGGGTTATCAAACCTCT       |                      |
| Loop B            |               |           | TATACATGTCTCTGGGACCAATGG                            |                      |
| <b>P2</b>         |               | F3        | GGTGTATTATTACCCTGACAAAG                             |                      |
|                   |               | B3        | GTACCAAAAATCCAGCCTC                                 |                      |
|                   |               | FIP       | TGGAACCAAGTAACATTGGAAAAGA-TTTTCAGATCCTCAGTTTTACATTC |                      |
|                   |               | BIP       | CTCTGGGACCAATGGTACTAAGAG-GACTTCTCAGTGGAAGCA         |                      |
|                   |               | Loop B    | AACCCTGTCCTACCATTTAATGATG                           |                      |
| <b>P3</b>         |               | F3        | CCTGACAAAGTTTTTCAGATCC                              |                      |
|                   |               | B3        | GTACCAAAAATCCAGCCTC                                 |                      |
|                   |               | FIP       | GCATGGAACCAAGTAACATTGGAAA-TCAGTTTTACATTCAACTCAGGA   |                      |
|                   |               | BIP       | CTCTGGGACCAATGGTACTAAGAG-GACTTCTCAGTGGAAGCA         |                      |
|                   |               | Loop B    | AACCCTGTCCTACCATTTAATGATG                           |                      |
| <b>Gene Orf 8</b> | <b>P1</b>     | F3        | ACGCCTAAACGAACATGAA                                 |                      |
|                   |               | B3        | AGAACCAGCCTCATCCAG                                  |                      |

|               |           |                           |                                                        |
|---------------|-----------|---------------------------|--------------------------------------------------------|
|               |           | FIP                       | GGTTGATGTTGAGTACATGACTGTA-<br>CTTGTTTTCTTAGGAATCATCACA |
|               |           | BIP                       | ATATGTAGTTGATGACCCGTGTCC-<br>TAAAGGTGCTGATTTTCTAGCT    |
|               |           | Loop F                    | CTACATTCTTGGTGAAATGCAGCTA                              |
|               | <b>P2</b> | F3                        | CTCAACATCAACCATATGTAGT                                 |
|               |           | B3                        | CAATTTAGGTTCTCGGCAATT                                  |
|               |           | FIP                       | GGTGCTGATTTTCTAGCTCCTACTC-<br>GACCCGTGTCCTATTCAC       |
|               |           | BIP                       | TGCTGGATGAGGCTGGTTCTA-<br>TGTAAGGTAACAGGAAACTG         |
|               | Loop B    | ATCACCCATTCAGTACATCGATATC |                                                        |
|               | <b>P3</b> | F3                        | AGCTGCATTTCAACCAAGAA                                   |
|               |           | B3                        | CGATATCGATGTAAGTGAATGG                                 |
|               |           | FIP                       | TGAATAGGACACGGGTCATCA-<br>GTAGTTTACAGTCATGTAAGTCAA     |
|               |           | BIP                       | GAGTAGGAGCTAGAAAATCAGCAC-<br>TGATTTAGAACCAGCCTCATC     |
| <b>Gene N</b> | <b>P1</b> | F3                        | GTTCCCTCATCACGTAGTCG                                   |
|               |           | B3                        | GTTTGGCCTTGTTGTTGTT                                    |
|               |           | FIP                       | GCCAGCCATTCTAGCAGGAG-<br>CAACAGTTAAGAAATTCAACTCC       |
|               |           | BIP                       | GATGCTGCTCTTGCTTTGCT-<br>ACCAGACATTTTCTCTCAA           |
|               |           | Loop B                    | GCTGCTTGACAGATTGAACCAG                                 |
|               | <b>P2</b> | F3                        | AGACGAATTCGTGGTGGT                                     |
|               |           | B3                        | TTGTTAGCAGGATTGCGG                                     |
|               |           | FIP                       | TGGCCAGTTCCTAGGTAGT-<br>GACGGTAAAATGAAAGATCTCAG        |
|               |           | BIP                       | CTTCCCTATGGTGCTAACAAGAC-<br>TGGTGTATTCAAGGCTCC         |
|               |           | Loop B                    | GGCATCATATGGGTTGCAACTGAG                               |
|               | <b>P3</b> | F3                        | GTCATTTGCTGAATAAGCATAT                                 |
|               |           | B3                        | GAGTCAGCACTGCTCATG                                     |
|               |           | FIP                       | TAAGGCTTGAGTTTCATCAGCCTT-<br>ACGCATACAAAACATTCCCA      |
|               |           | BIP                       | CAGAGACAGAAGAAACAGCAAAC-<br>GATTGTTGCAATTGTTGGAG       |
|               |           | Loop B                    | GTGACTCTTCTTCTGCTGCAGATT                               |

**Table S2. Supply chain: RT-LAMP and RT-PCR assay**

See excel file.

**Video S1. Uniform filling of the amplification chambers.**

See video

**Video S2. Time stamped videos of amplification on the cartridge for 5000 copies/ $\mu$ L of virus in VTM.**

See video

**Video S3. Time stamped videos of amplification on the cartridge for negative control (VTM only).**

See video
